# Supplementary material for: Relationship between serum phosphate levels and survival in chronic hemodialysis patients: interactions with age, malnutrition and inflammation
Source: PubMed Central journal article supplement — Clin Kidney J. 2019 Dec 5;14(1):348–57. doi: 10.1093/ckj/sfz143 (PMC7857835; doi:10.1093/ckj/sfz143), 2019-12-05

**Supplemental  
figure 1 A**

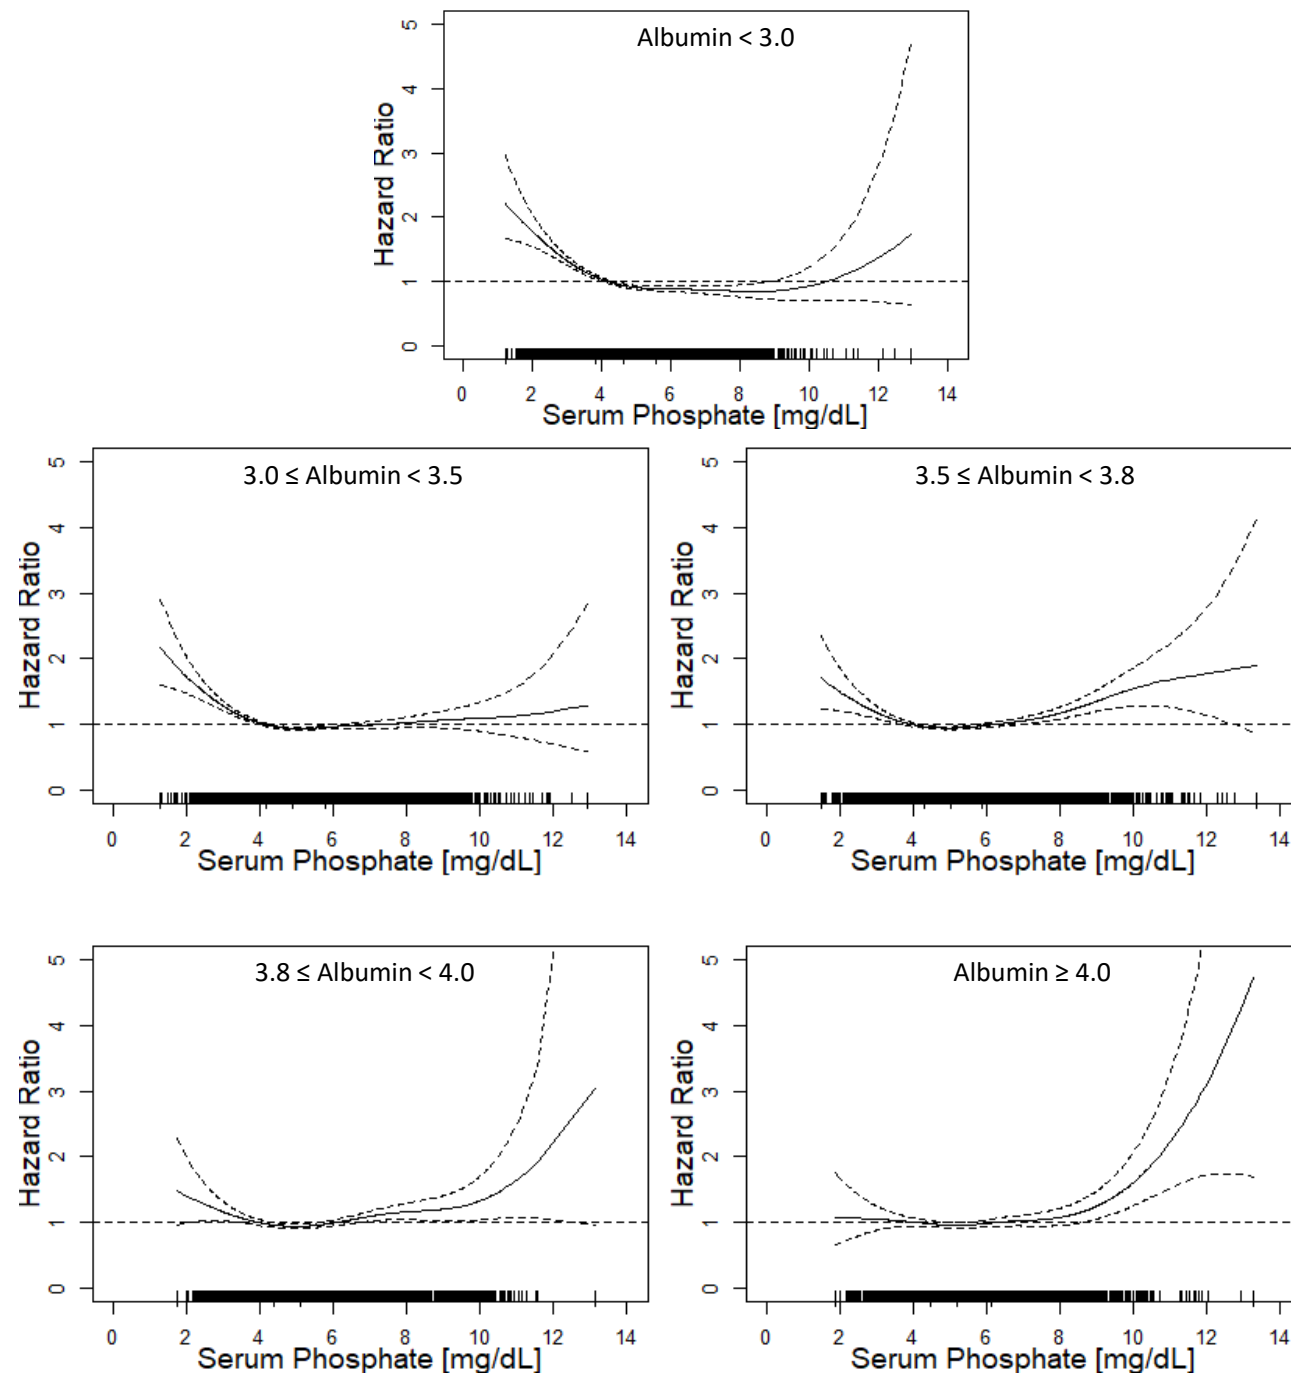

Supplemental  
figure 1 B

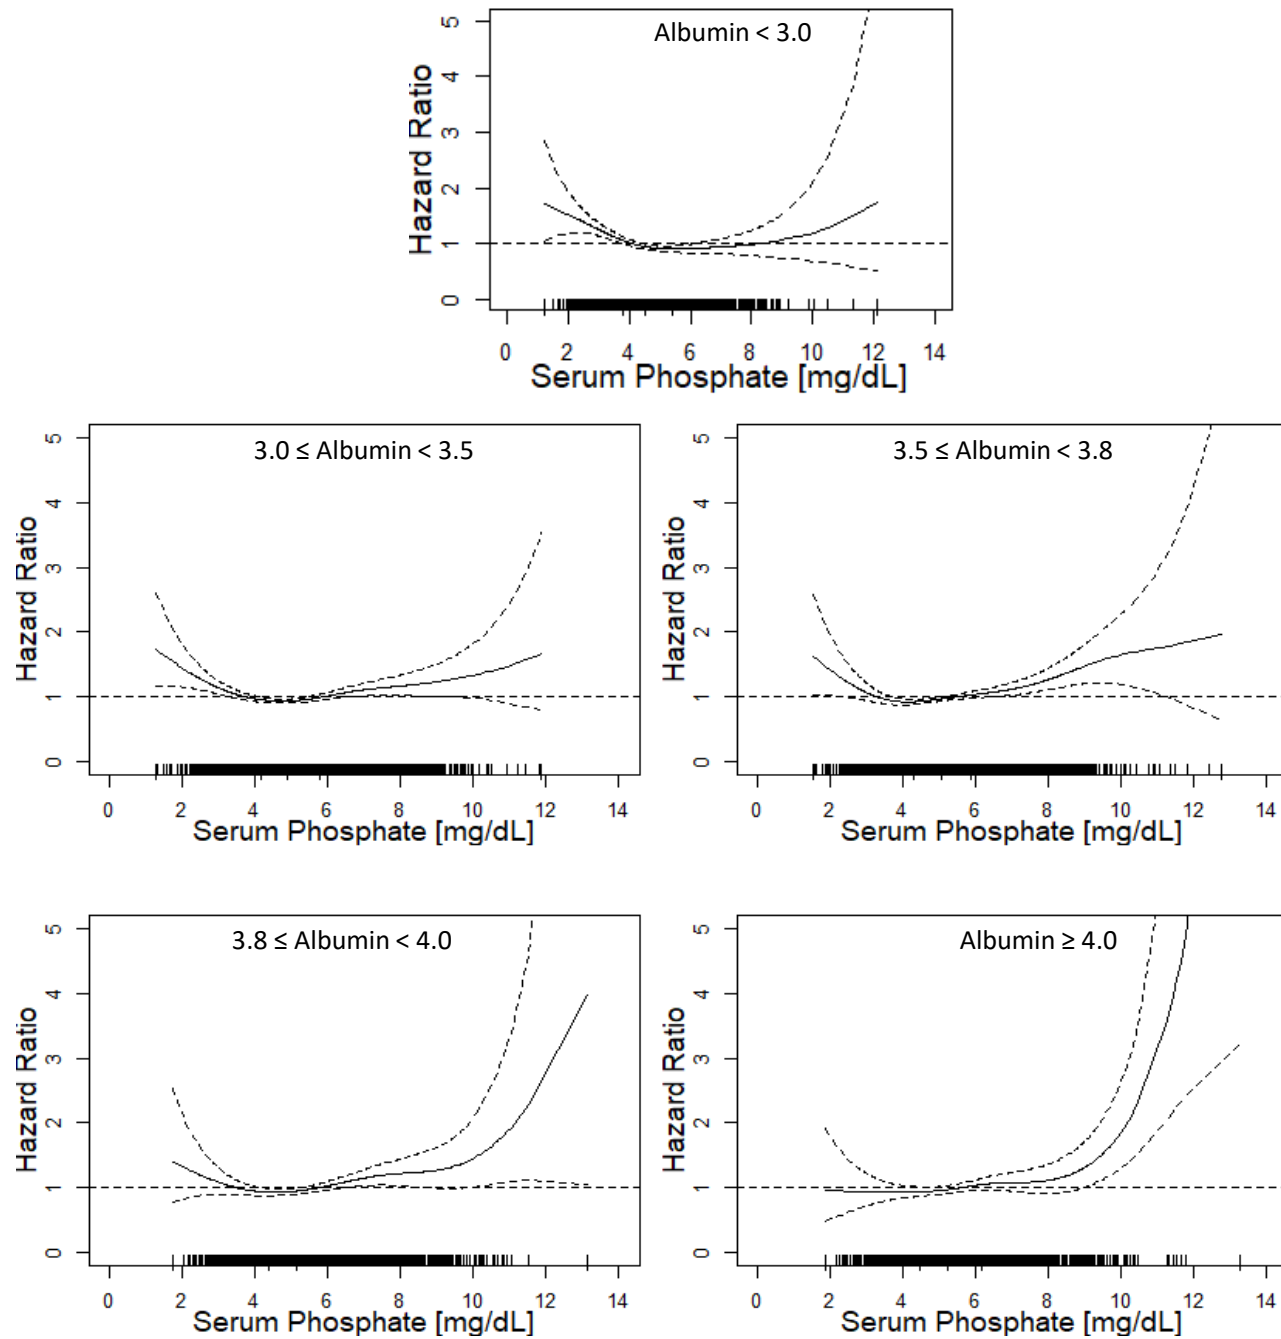

# Supplemental figure 2 A

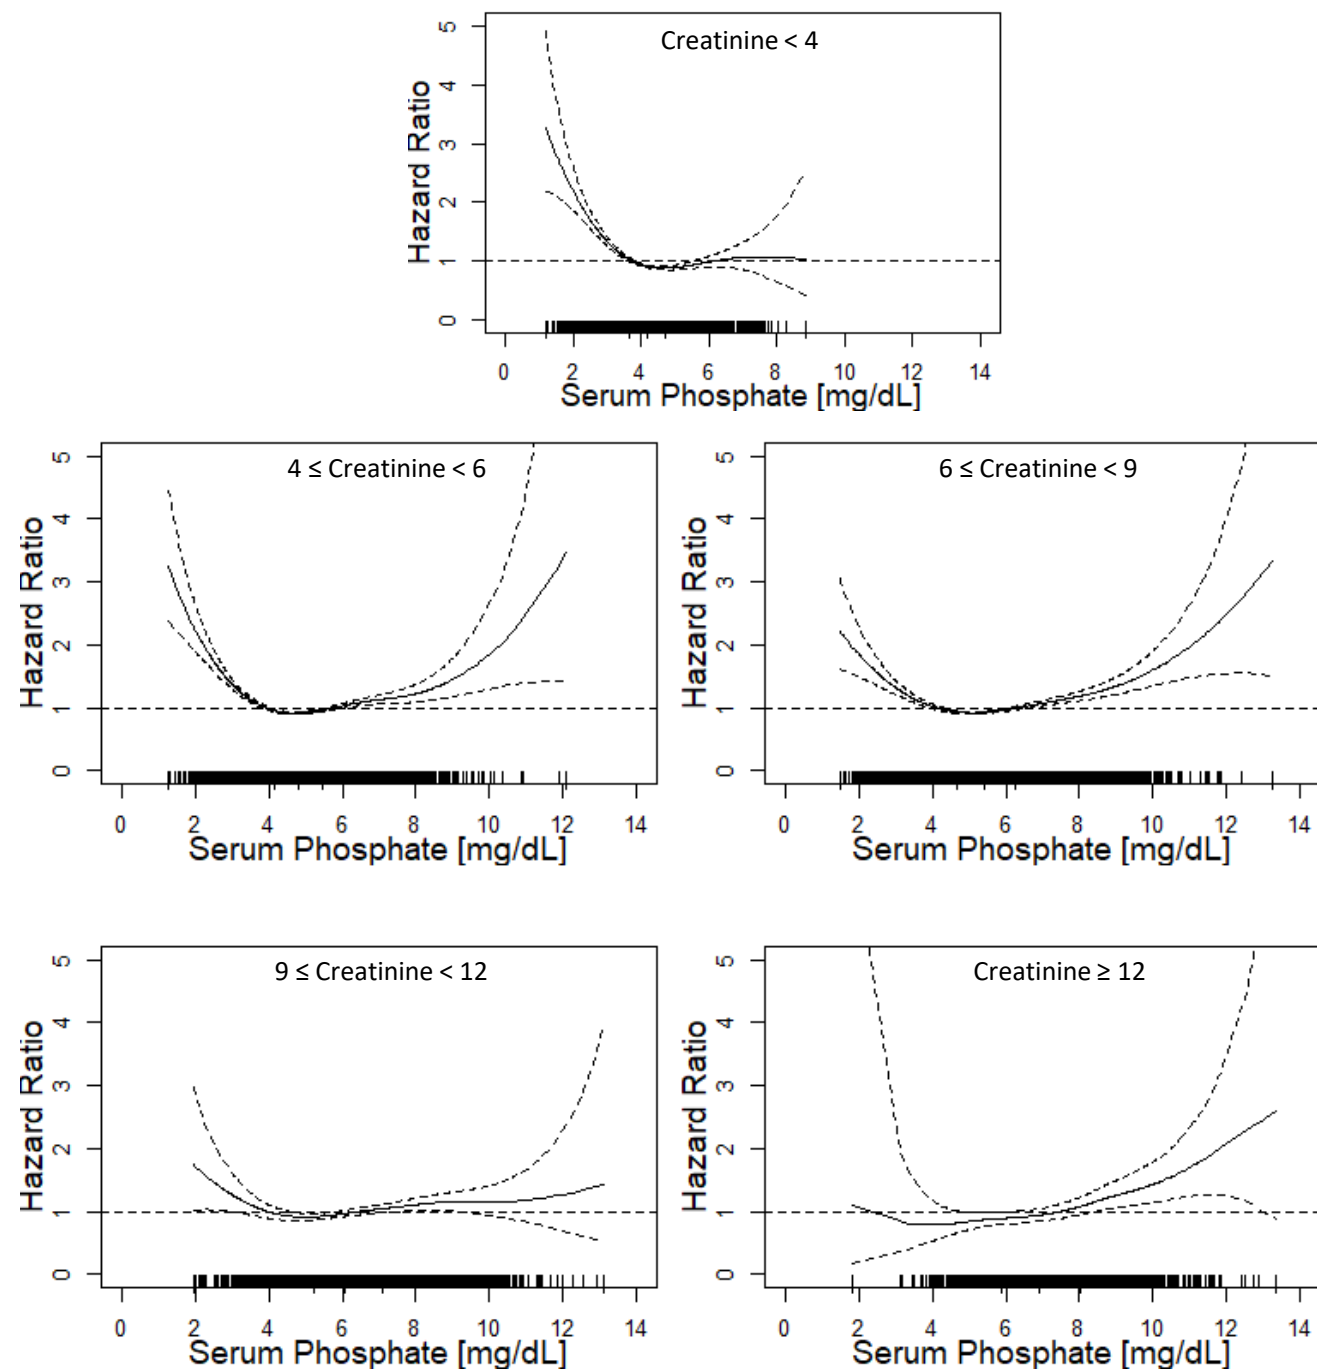

**Supplemental  
figure 2 B**

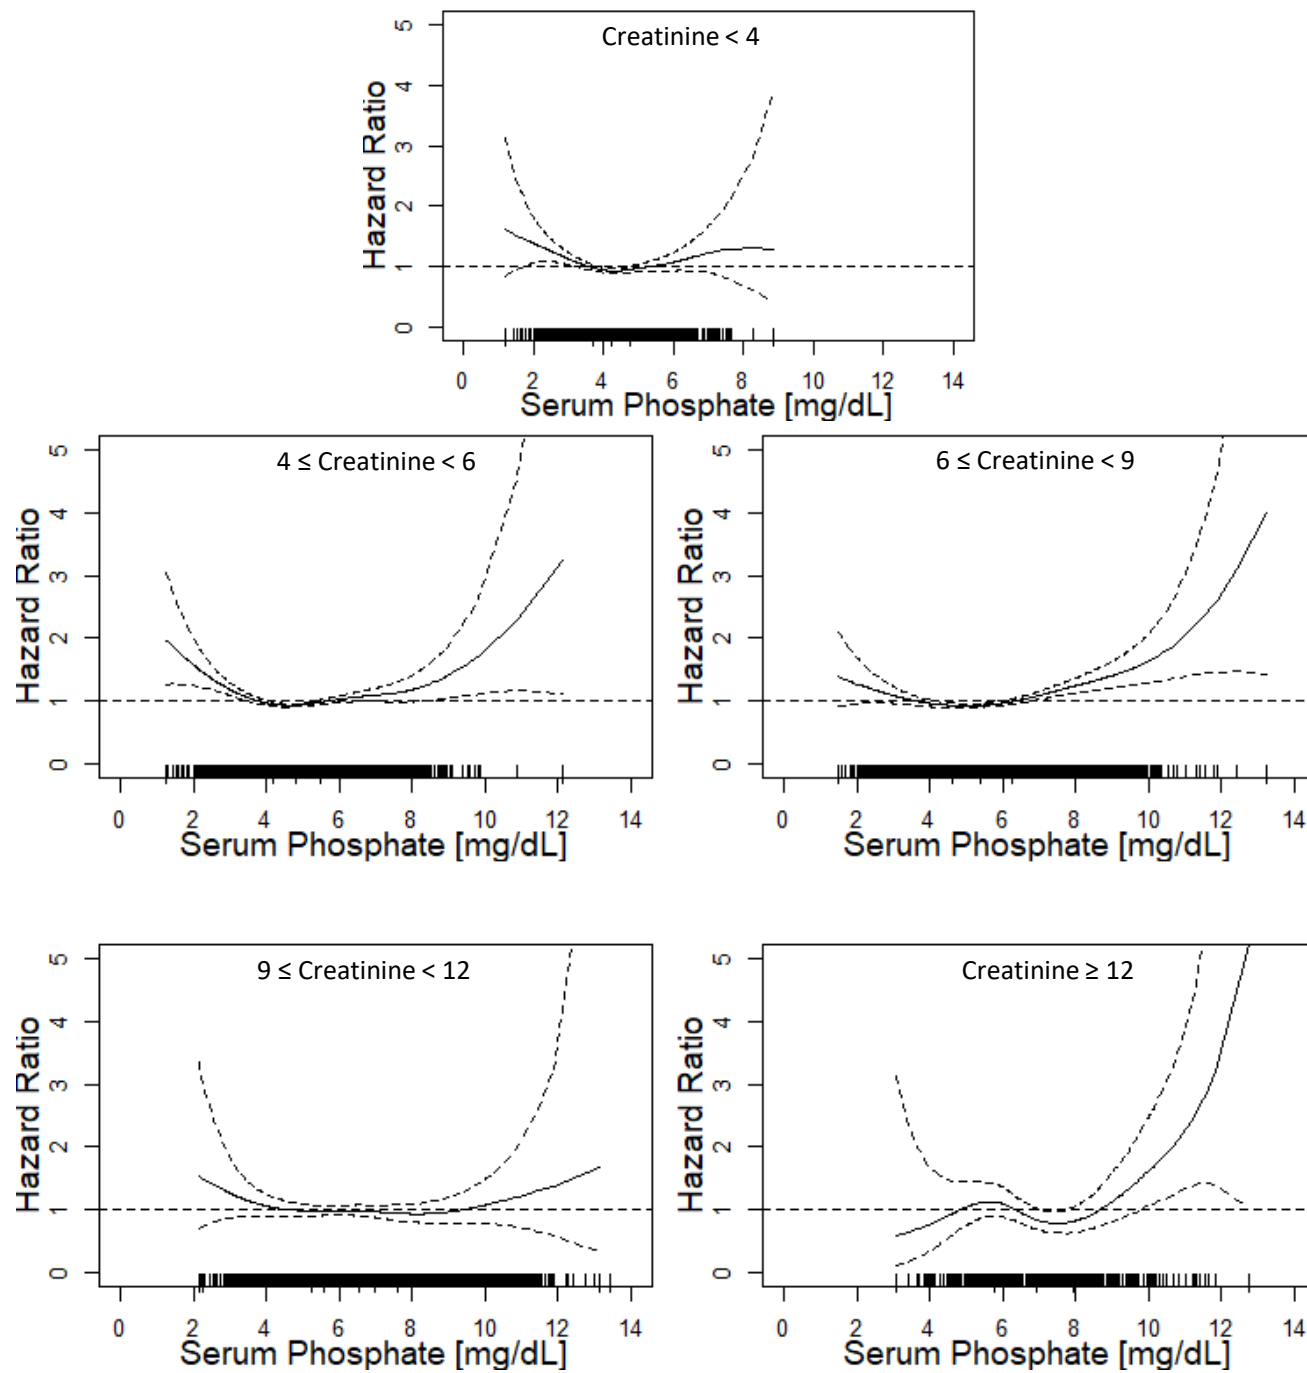

Supplemental  
figure 3 A

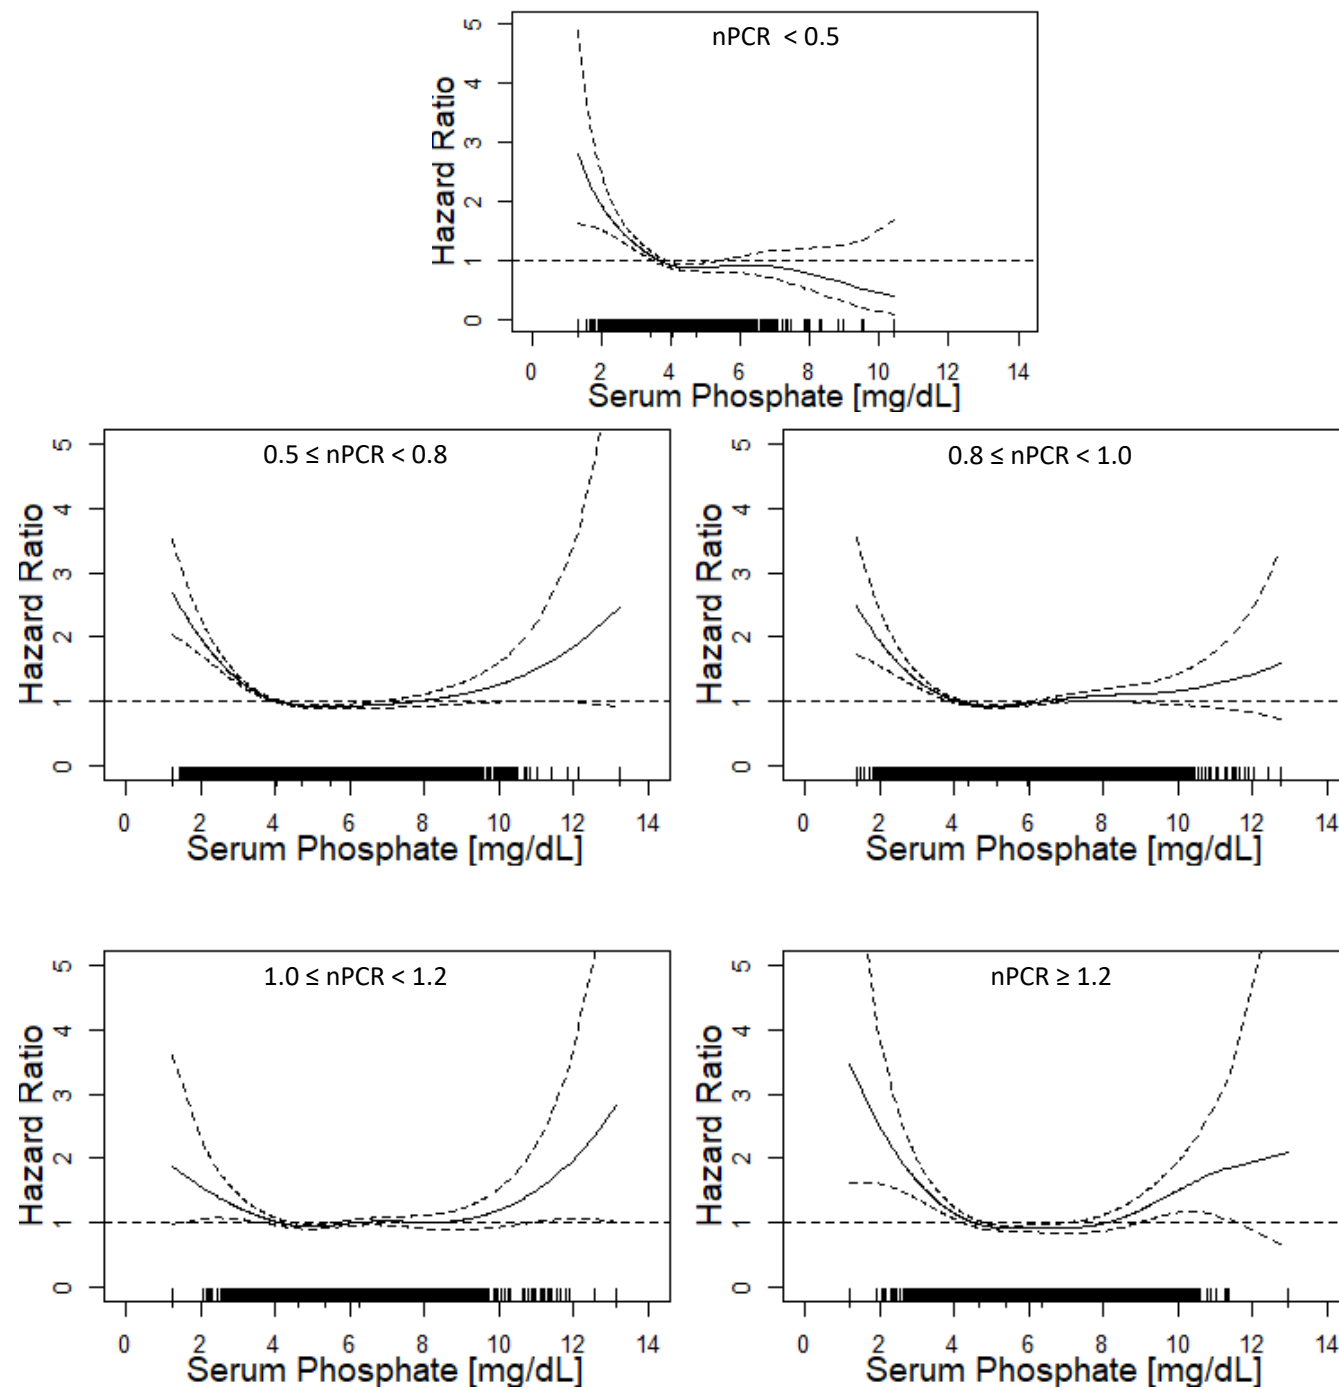

**Supplemental  
figure 3 B**

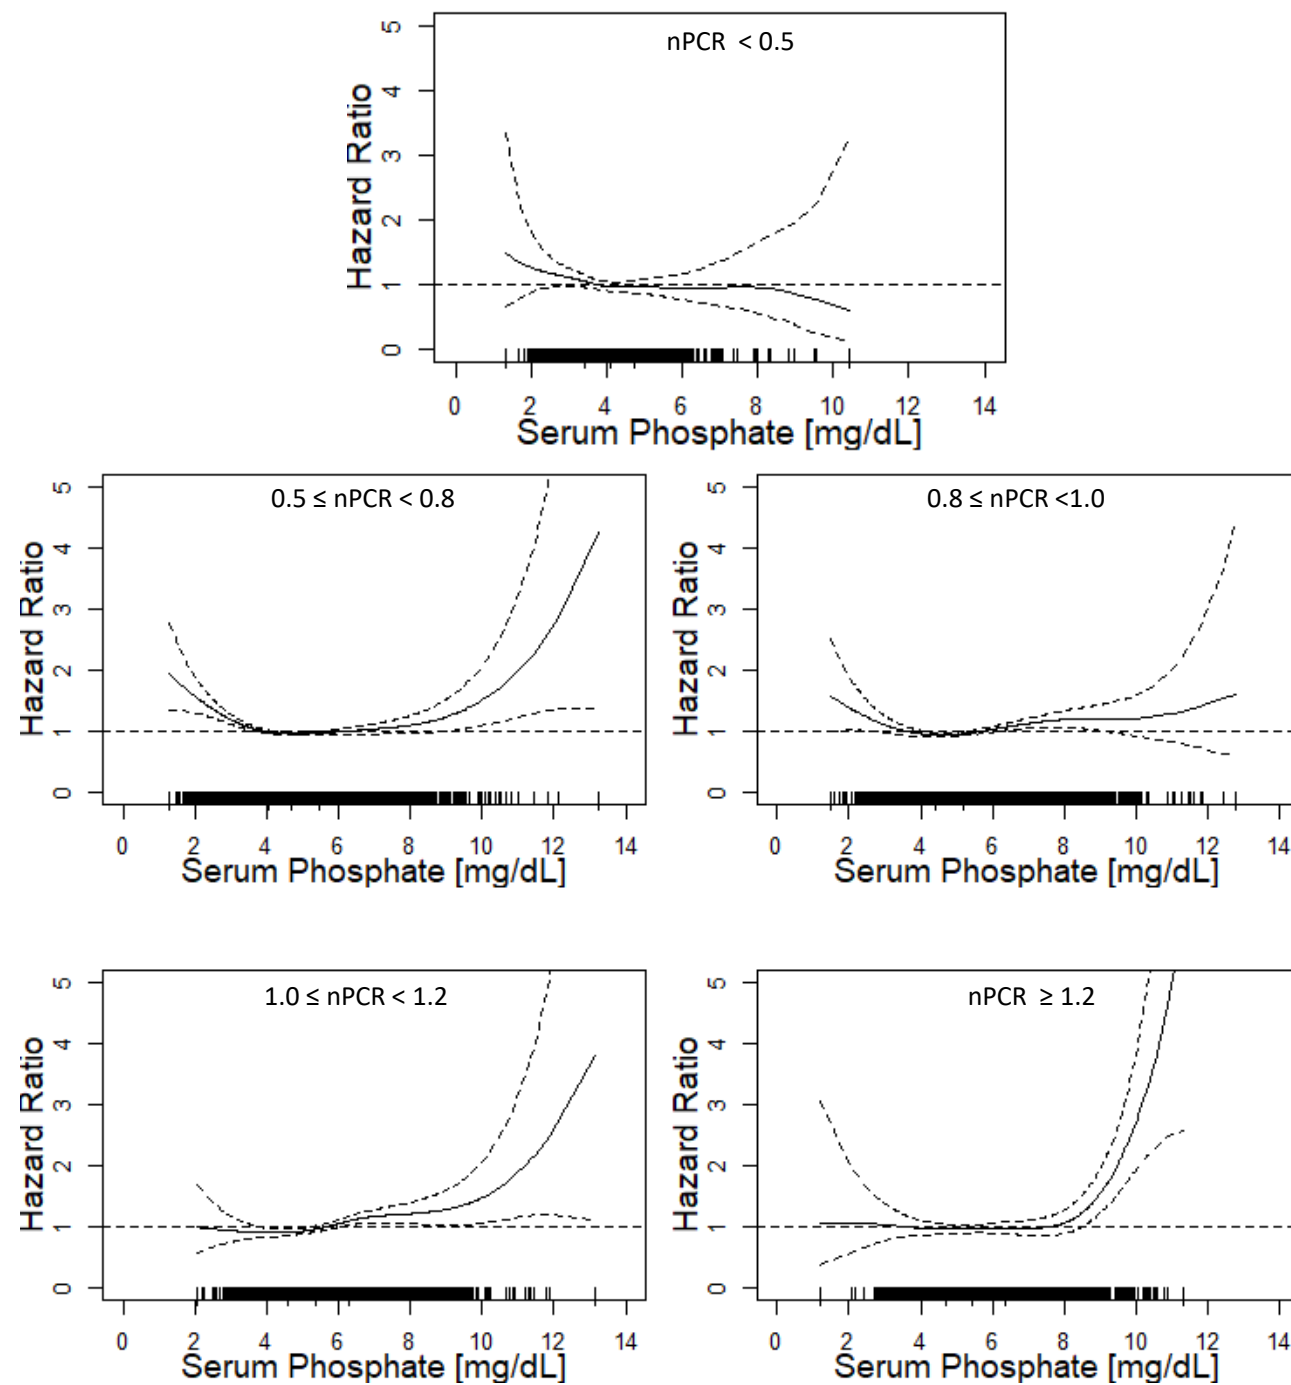

Supplemental  
figure 4 A

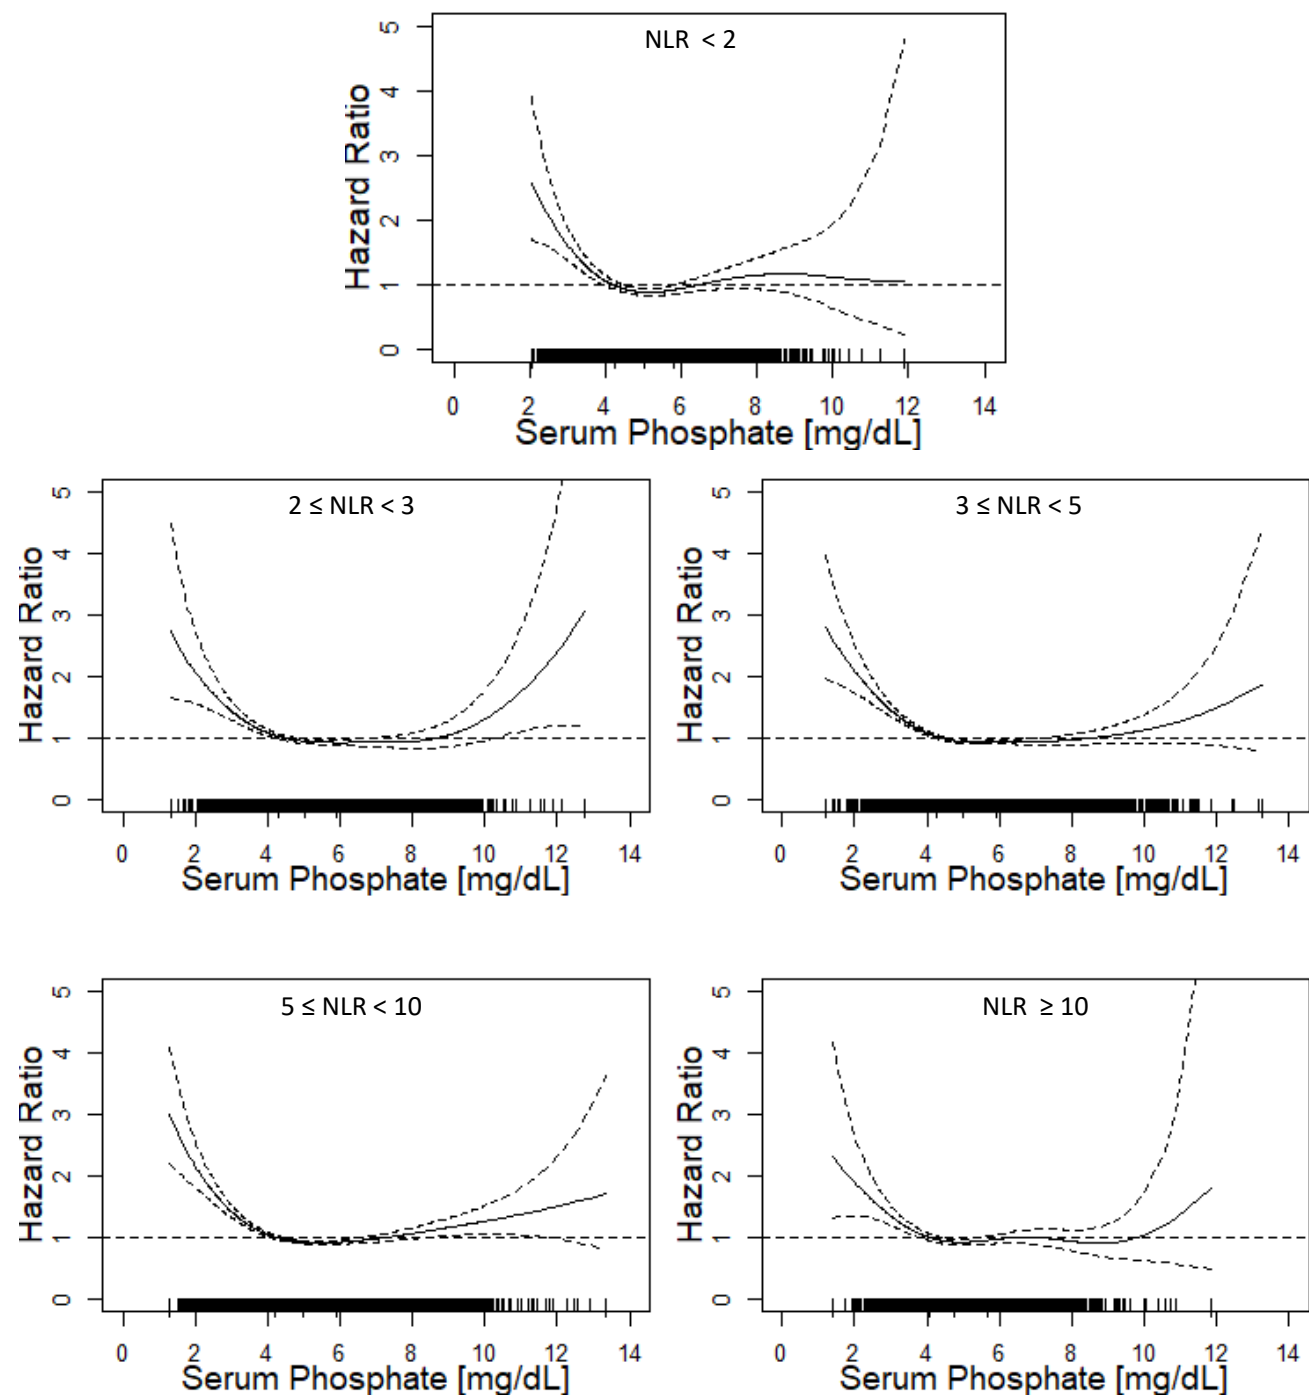

Supplemental  
figure 4 B

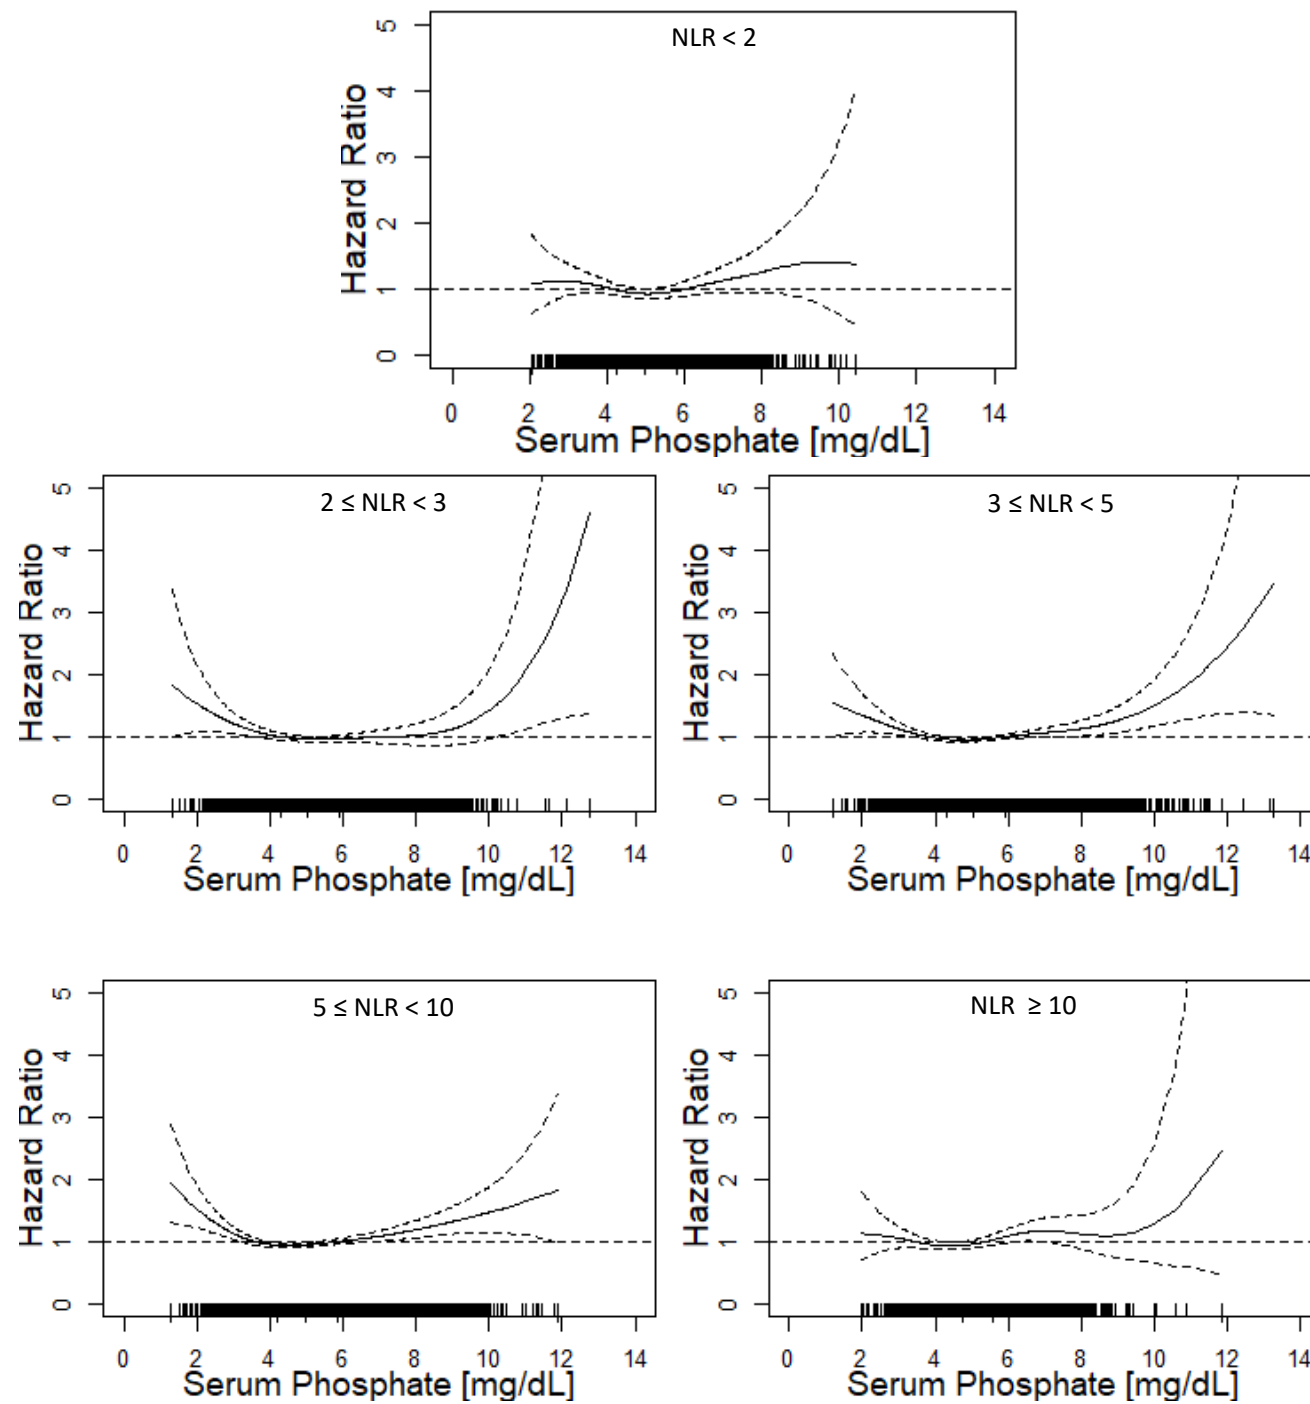

Supplement: sfz143_supplementary_data.pdf [file sfz143_supplementary_data.pdf]
